# Supplementary material
Source: Springer Nature journal article supplement (https://www.springermedizin.de/resource/supplementary/12888_2013_1388_MOESM8_ESM.pdf/9480098)

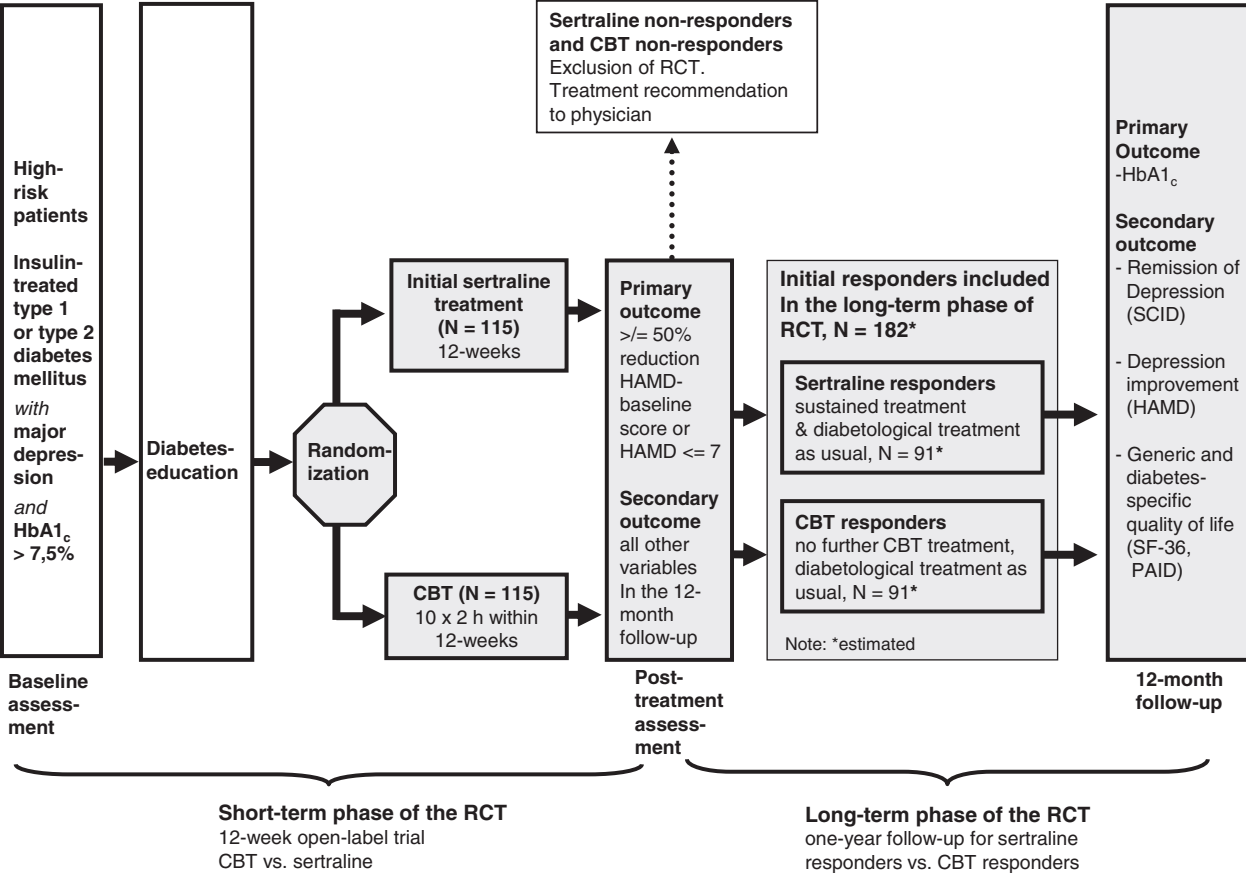

Supplement: MOESM8 [file 9480098]
